# Supplementary material
Source: MDPI journal article supplement (https://www.mdpi.com/1424-8247/17/2/188)

# **Antimicrobial evaluation of sulfonamides after coupling with thienopyrimidines coplanar structure**

Elshaymaa I. Elmongy <sup>1</sup>, Wejdan S. Alanazi <sup>2</sup>, Alhanouf I. Aldawsari <sup>2</sup>, Asma A. Alfaouri<sup>2</sup>,  
Reem Binsuwaidan<sup>3\*</sup>

1 Department of Pharmaceutical Chemistry, Faculty of Pharmacy, Helwan University, Ain Helwan, Cairo P.O. Box 11795, Egypt; shaymaa.taha@pharm.helwan.edu.eg

2 College of Pharmacy, Princess Nourah bint Abdulrahman University, P.O. Box 84428, Riyadh 11671, Saudi Arabia; wejdan.saad18@gmail.com; hanouff568@gmail.com; asma.ayed.al@gmail.com

3 Department of Pharmaceutical Sciences, College of Pharmacy, Princess Nourah bint Abdulrahman University, P.O. Box 84428, Riyadh 11671, Saudi Arabia; rabinsuwaidan@pnu.edu.sa

\* Correspondence: rabinsuwaidan@pnu.edu.sa

# $^1\text{H}$ NMR

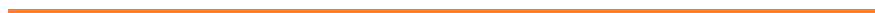

12i-

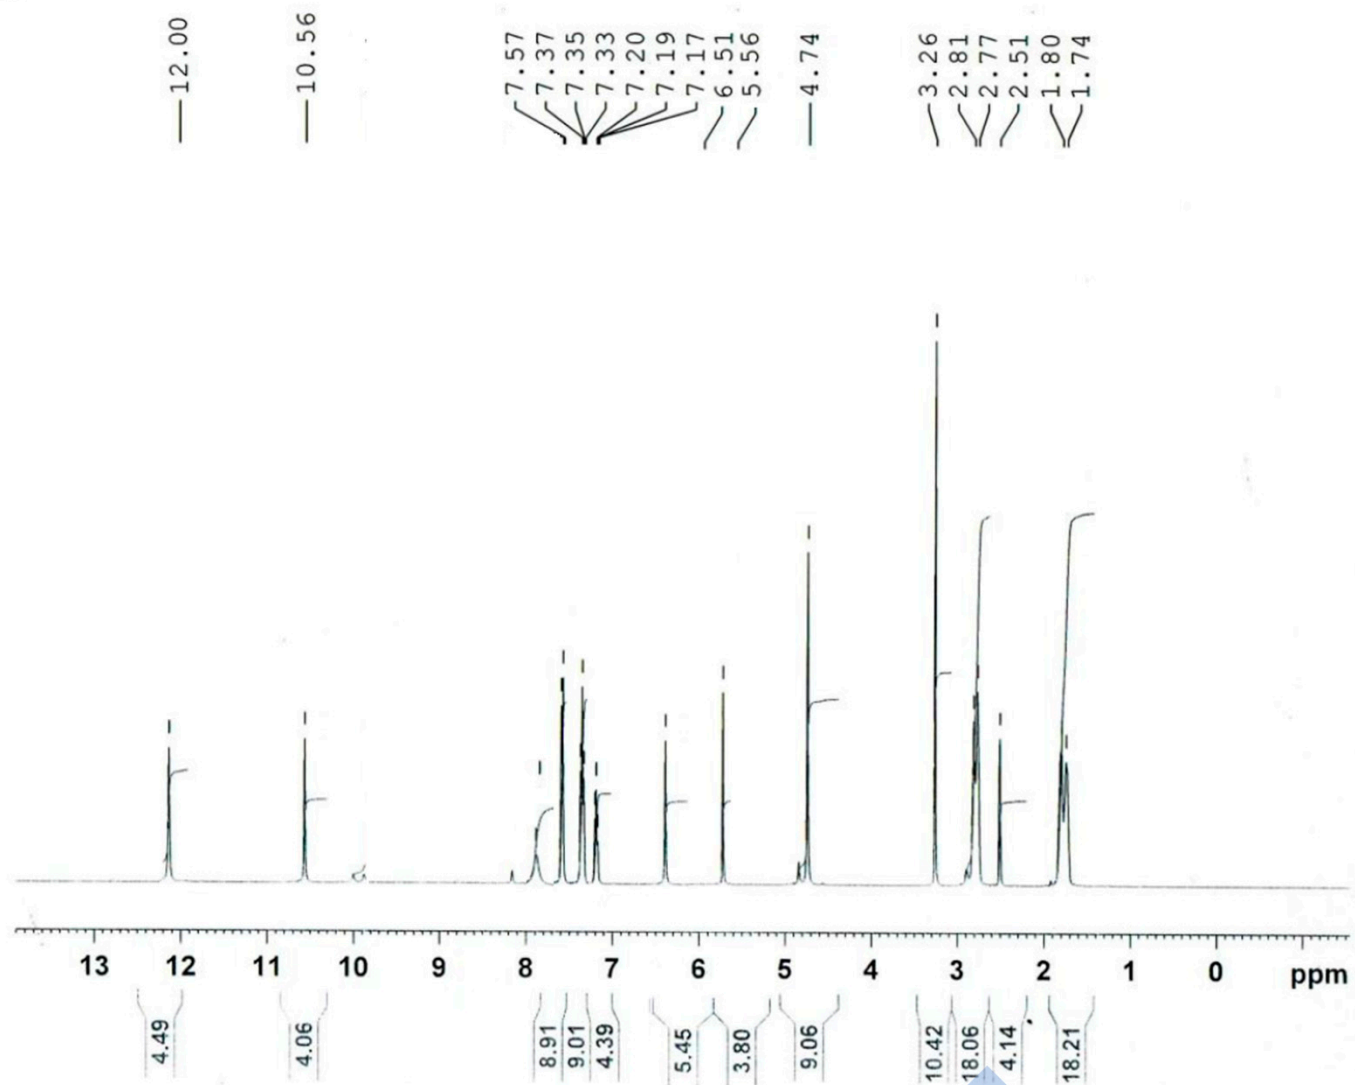

12II

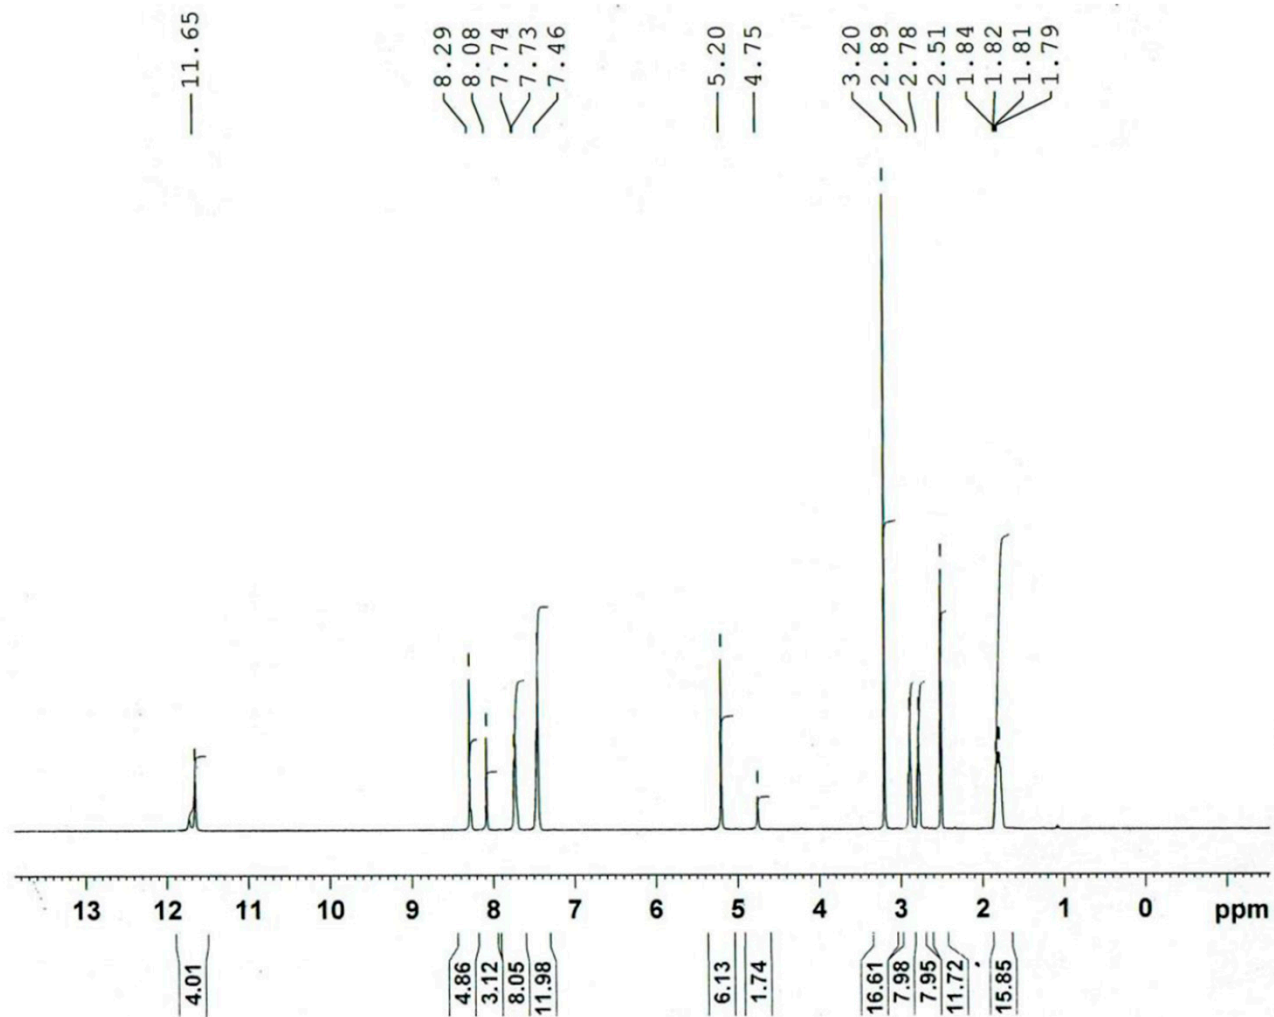

12III

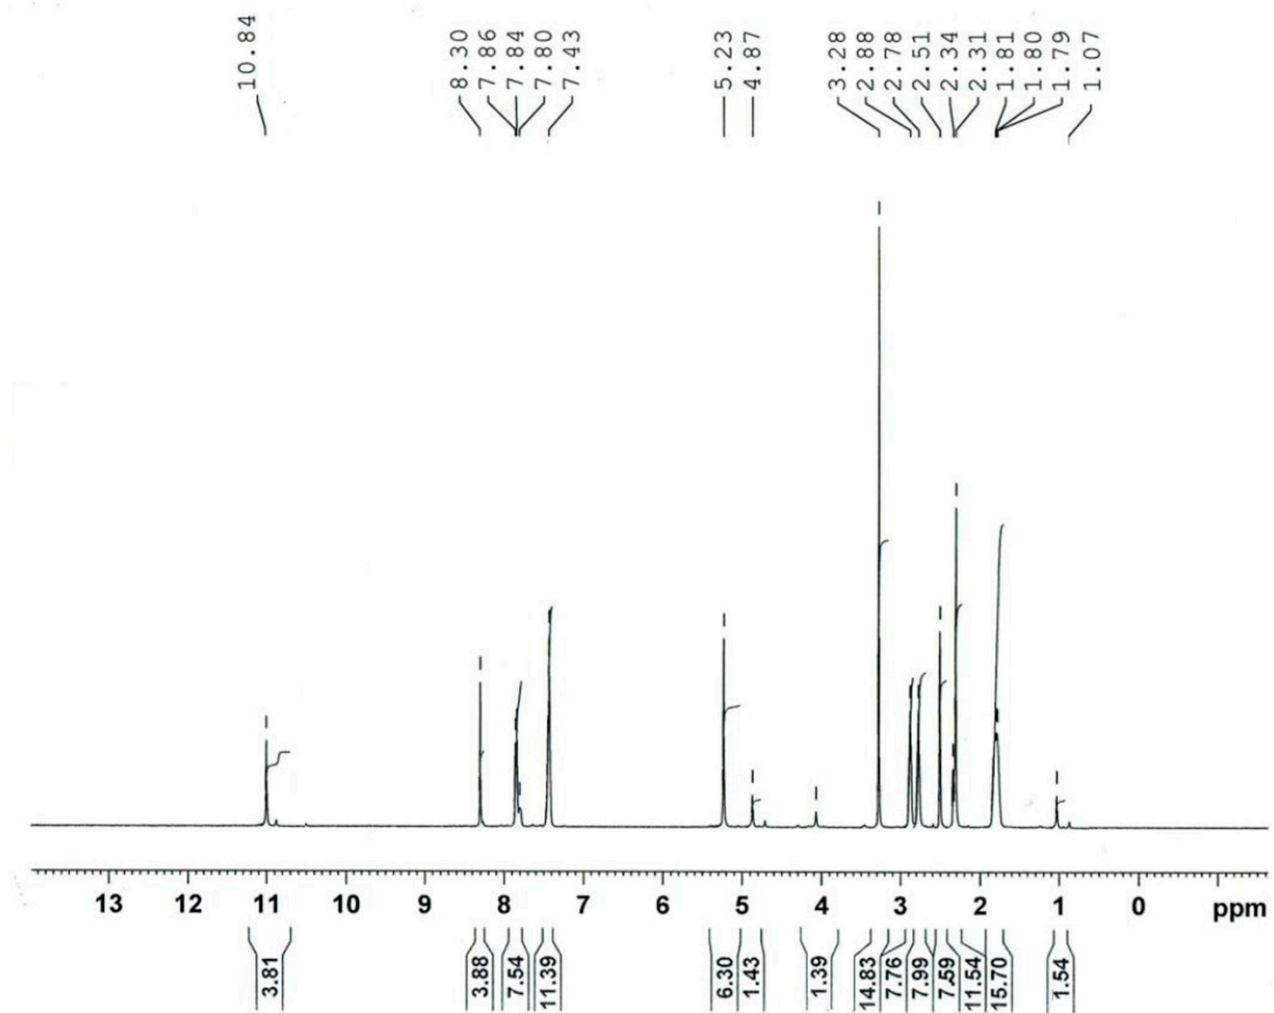

# C-13 NMR

---

121

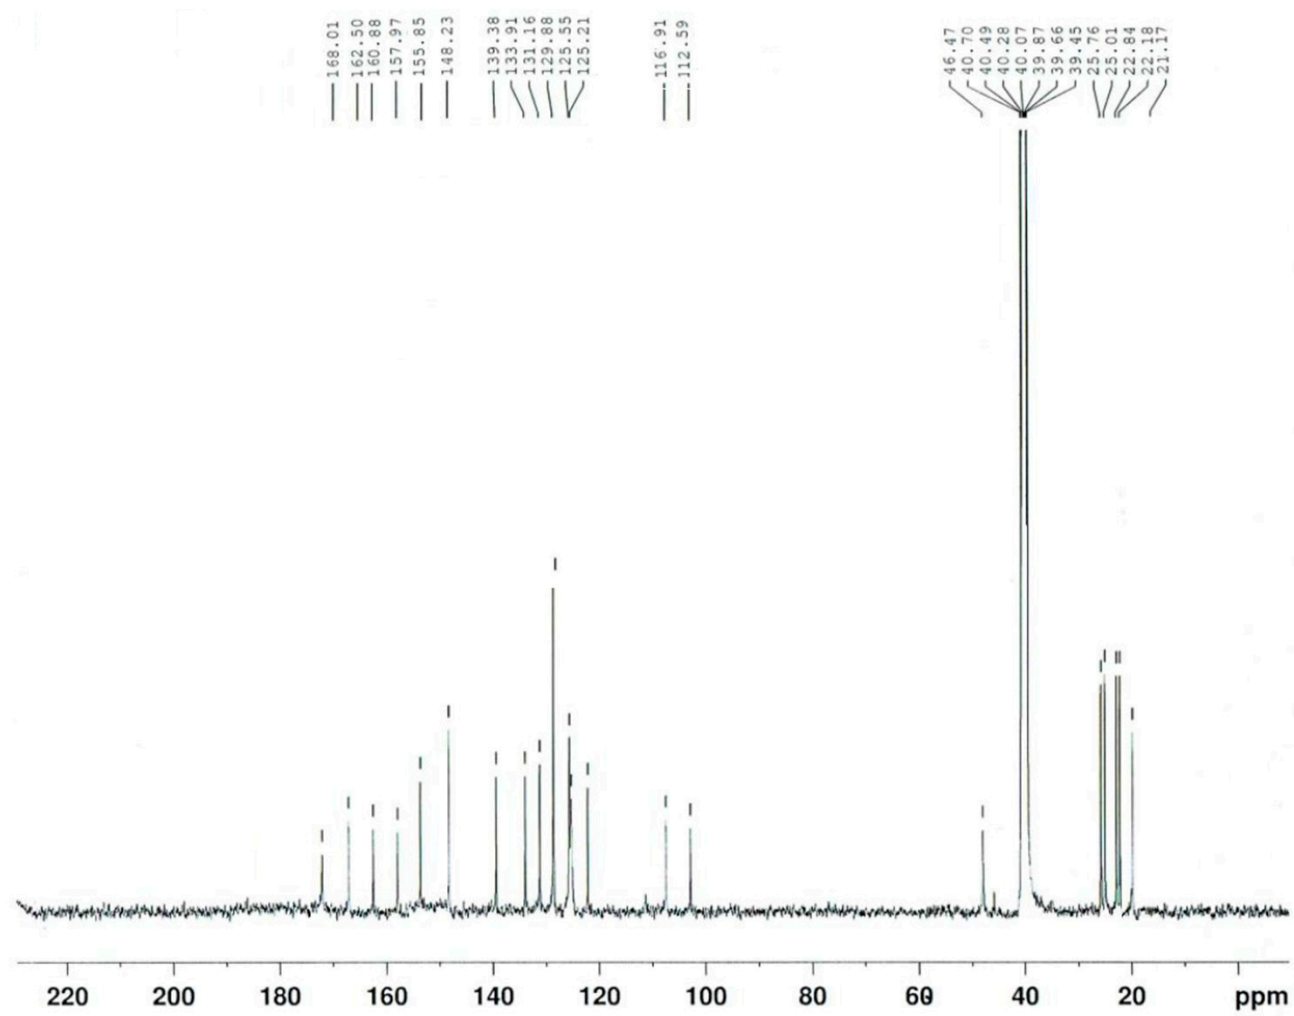

12H

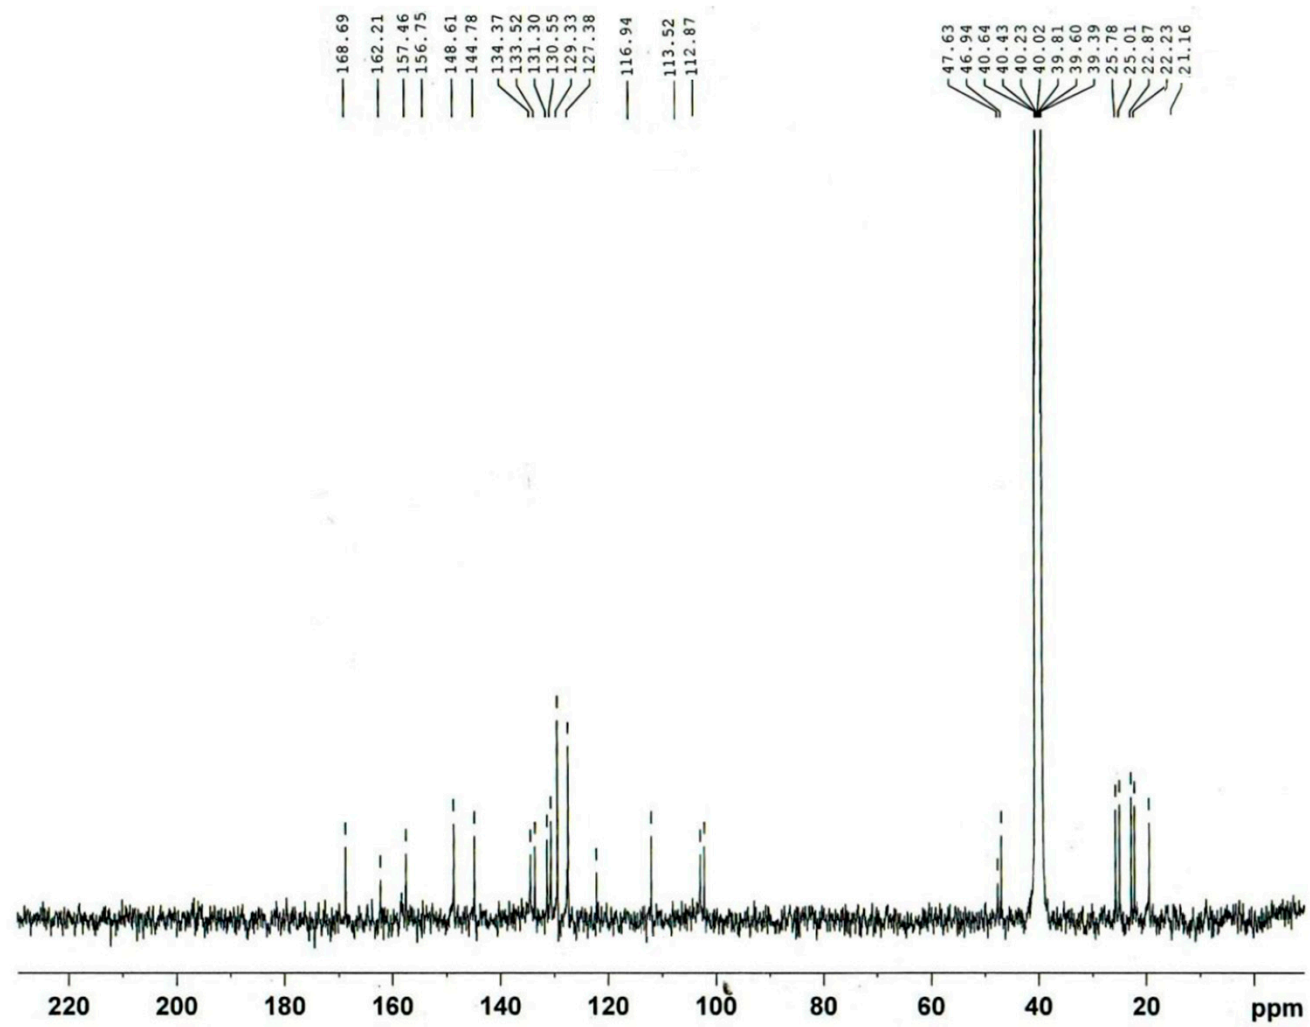



12III

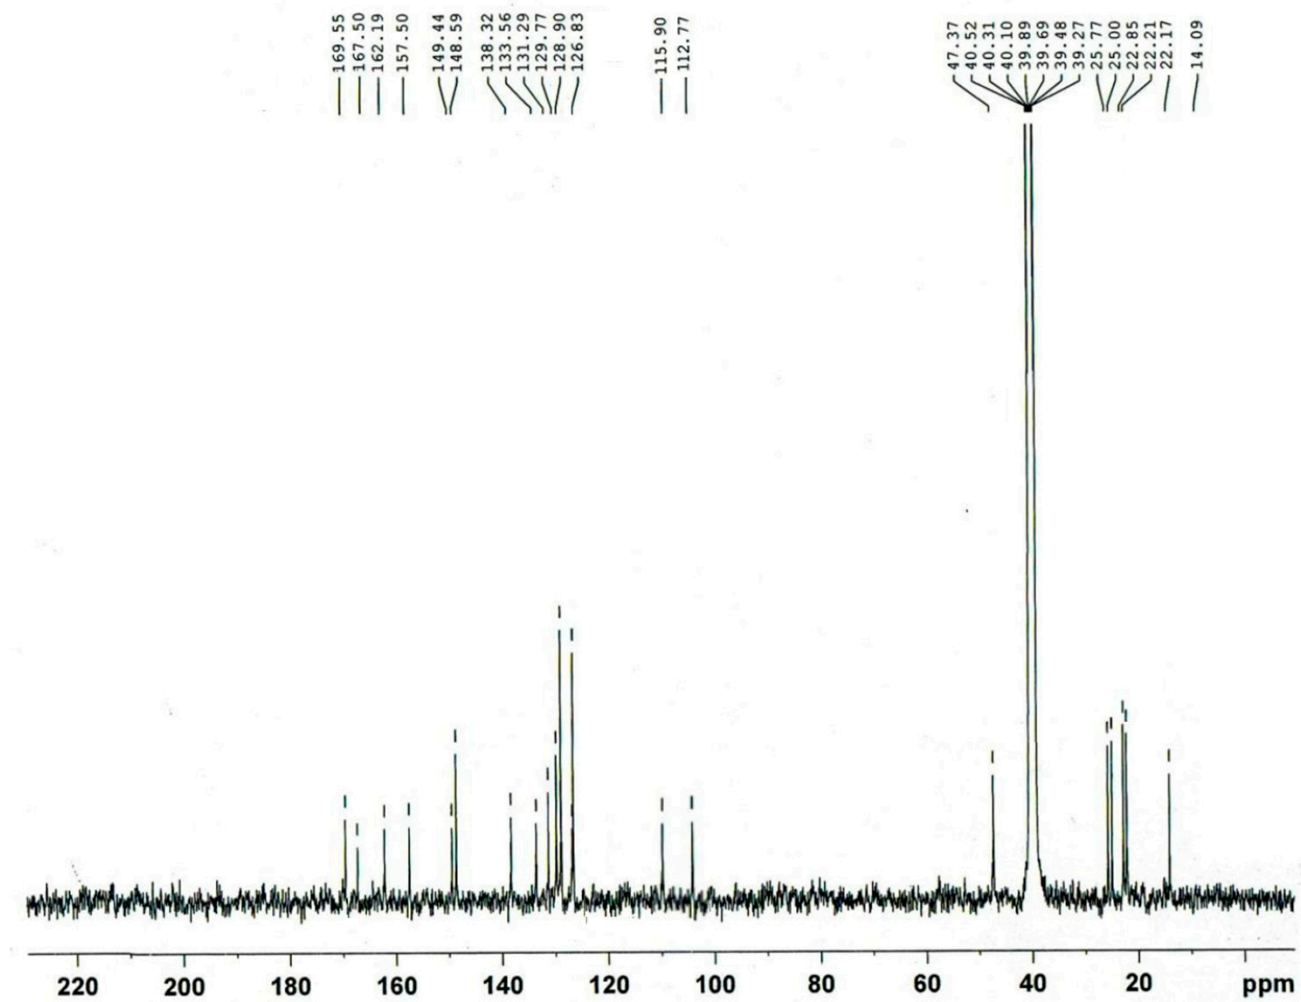

# MASS

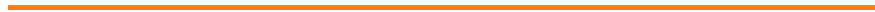

121

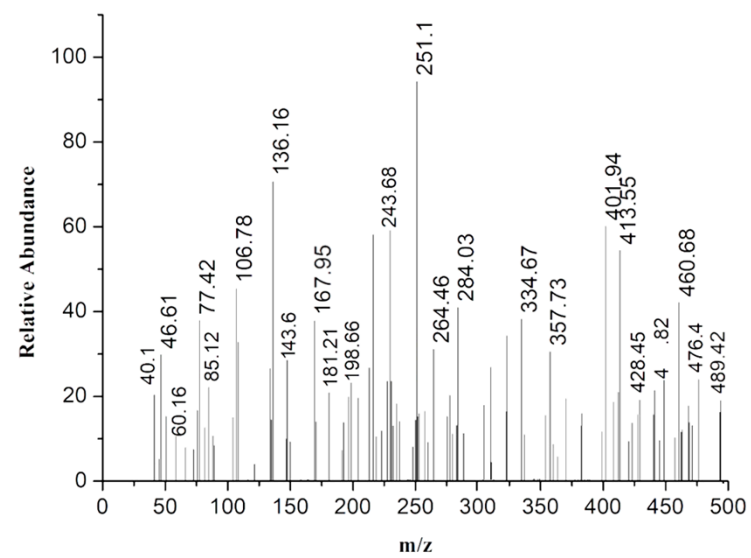

1211

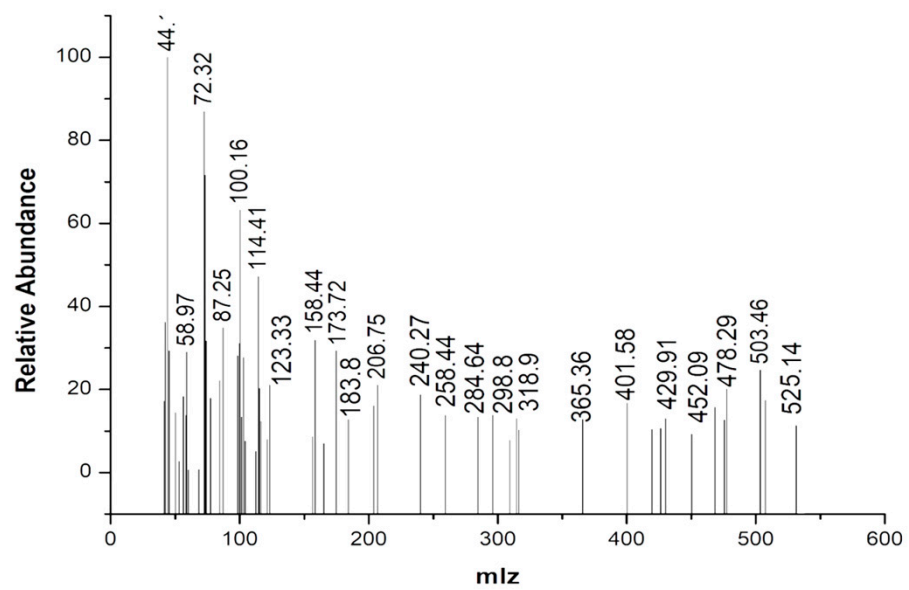

12III

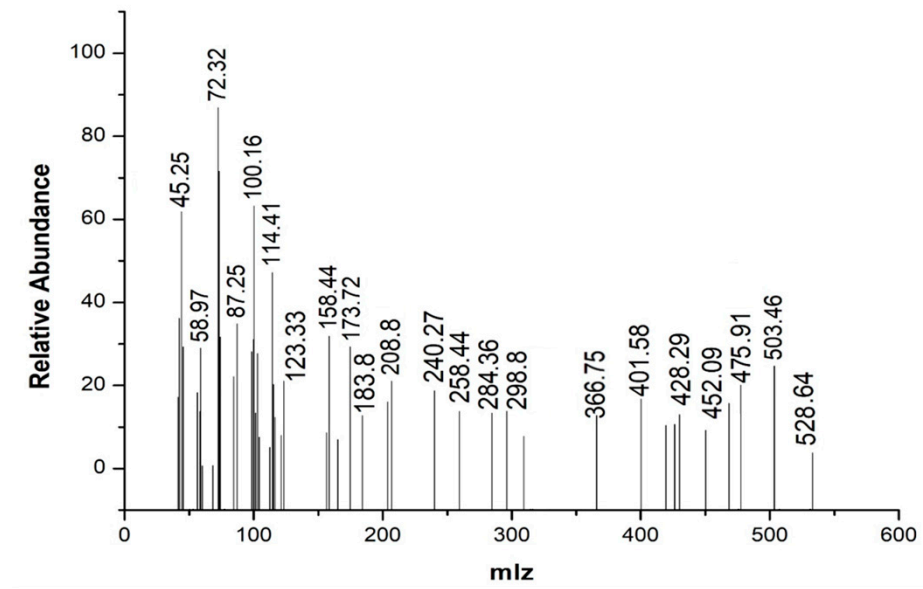

Supplement: s1 [file s1]
